# Supplementary material for: Co-occurring PAHs and Heavy Metals Drive Bacterial Community Shifts in China’s Beiluo River Riparian Soils
Source: Research Square preprint supplement (doi:10.21203/rs.3.rs-7543329/v1), 2025-09-16
Supplement: Supplementary file 1 [file 52d7e98dc364df16a462f15a.docx]

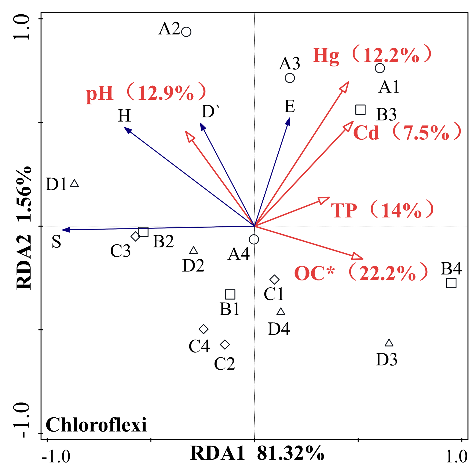


**Fig. S1.** RDA redundancy analysis of Chloroflexi gate

**Table S1. Soil properties at sampling sites.**

| **ID** | **A1** | **A2** | **A3** | **A4** | **B1** | **B2** | **B3** | **B4** | **C1** | **C2** | **C3** | **C4** | **D1** | **D2** | **D3** | **D4** |
| --- | --- | --- | --- | --- | --- | --- | --- | --- | --- | --- | --- | --- | --- | --- | --- | --- |
| **OC (g/kg)** | 1.85 | 2.13 | 2.14 | 7.50 | 1.54 | 1.41 | 2.38 | 37.87 | 2.07 | 2.25 | 3.09 | 2.16 | 1.67 | 1.26 | 2.53 | 2.58 |
| **TN (g/kg)** | 0.18 | 0.21 | 0.23 | 0.76 | 0.14 | 0.15 | 0.21 | 3.40 | 0.23 | 0.22 | 0.34 | 0.25 | 0.16 | 0.12 | 0.23 | 0.24 |
| **TP (g/kg)** | 0.61 | 0.59 | 0.56 | 0.69 | 0.59 | 0.49 | 0.56 | 0.64 | 0.51 | 0.53 | 0.58 | 0.55 | 0.53 | 0.60 | 0.55 | 0.57 |
| **MC (%)** | 19.54 | 19.64 | 16.53 | 16.23 | 22.74 | 25.25 | 18.19 | 33.70 | 29.11 | 21.56 | 30.70 | 25.03 | 27.87 | 19.07 | 27.80 | 14.82 |
| **pH** | 9.05 | 8.96 | 8.84 | 8.30 | 8.72 | 8.93 | 8.76 | 8.51 | 8.85 | 8.88 | 8.64 | 8.67 | 9.08 | 8.82 | 8.65 | 8.70 |

**Table S2.** **The RQMPCs values of PAHs in the riverbank soil.**

|  | **Nap** | **Acy** | **Ace** | **Flu** | **Phe** | **Ant** | **Fla** | **Pyr** |
| --- | --- | --- | --- | --- | --- | --- | --- | --- |
| A1 | 1.16×10-1 | 3.85×10-3 | 7.21×10-3 | 9.52×10-3 | 6.79×10-3 | 2.69×10-3 | 6.77×10-4 | 4.53×10-2 |
| A2 | 1.32×10-1 | 5.31×10-3 | 9.48×10-3 | 1.09×10-2 | 8.44×10-3 | 1.37×10-3 | 7.69×10-4 | 4.75×10-2 |
| A3 | 2.80×10-1 | 6.20×10-3 | 9.57×10-3 | 1.62×10-2 | 9.31×10-3 | 1.52×10-3 | 5.58×10-4 | 2.74×10-2 |
| A4 | 1.45×10-1 | 1.43×10-2 | 1.35×10-2 | 1.63×10-2 | 3.00×10-2 | 1.12×10-2 | 4.96×10-3 | 9.62×10-2 |
| B1 | 1.08×10-1 | 2.18×10-3 | 4.26×10-3 | 8.87×10-3 | 5.66×10-3 | 3.28×10-4 | 1.91×10-4 | 2.00×10-3 |
| B2 | 1.14×10-1 | - | 6.03×10-3 | 1.26×10-2 | 9.58×10-3 | 9.91×10-4 | 2.17×10-4 | - |
| B3 | 2.50×10-1 | 3.93×10-3 | 6.69×10-3 | 1.65×10-2 | 1.31×10-2 | 1.01×10-3 | 3.13×10-4 | - |
| B4 | 1.21×10-1 | 7.77×10-3 | 1.32×10-2 | 2.53×10-2 | 2.99×10-2 | 9.01×10-3 | 3.33×10-3 | 5.66×10-2 |
| C1 | 3.24×10-1 | 3.95×10-3 | 9.58×10-3 | 3.62×10-2 | 1.85×10-2 | 1.73×10-3 | 4.19×10-4 | 3.14×10-3 |
| C2 | 1.04×10-1 | 2.51×10-3 | 5.50×10-3 | 9.10×10-3 | 7.11×10-3 | 1.12×10-3 | 2.98×10-4 | - |
| C3 | 1.08×10-1 | 4.29×10-3 | 1.00×10-2 | 1.21×10-2 | 1.40×10-2 | 5.31×10-3 | 8.79×10-4 | 1.63×10-2 |
| C4 | 5.76×10-2 | 7.91×10-3 | 1.26×10-2 | 1.13×10-2 | 1.87×10-2 | 1.04×10-3 | 2.25×10-3 | 4.87×10-2 |
| D1 | - | 2.41×10-3 | 3.55×10-3 | 2.44×10-3 | 2.90×10-3 | 2.13×10-3 | 3.67×10-4 | 5.58×10-3 |
| D2 | 3.42×10-3 | 1.60×10-3 | - | - | - | 7.73×10-4 | 7.75×10-5 | - |
| D3 | 3.16×10-2 | - | 1.76×10-3 | 2.02×10-3 | 3.08×10-3 | 2.61×10-3 | 3.27×10-4 | 4.89×10-3 |
| D4 | 1.06×10-1 | 4.76×10-3 | 1.75×10-2 | 3.49×10-2 | 3.56×10-2 | 8.68×10-3 | 2.42×10-3 | 4.69×10-2 |

**Table S2.** **The RQMPCs values of PAHs in the riverbank soil.**

|  | **BaA** | **Chry** | **BbF** | **BkF** | **BaP** | **InP** | **DaA** | **BgP** | **∑16PAHs** |
| --- | --- | --- | --- | --- | --- | --- | --- | --- | --- |
| A1 | 1.71×10-3 | 6.97×10-5 | 1.99×10-3 | 8.55×10-5 | - | - | - | 2.64×10-5 | 1.95×10-1 |
| A2 | 2.6×10-3 | 1.28×10-4 | 3.33×10-3 | 1.95×10-4 | 1.90×10-3 | 6.41×10-5 | 7.23×10-4 | 1.34×10-4 | 2.25×10-1 |
| A3 | 2.24×10-3 | 9.76×10-5 | 2.99×10-3 | 1.57×10-4 | 1.48×10-3 | 6.70×10-5 | 8.76×10-4 | 8.28×10-5 | 3.59×10-1 |
| A4 | - | 7.21×10-4 | 2.79×10-2 | 1.86×10-3 | 1.16×10-2 | 5.12×10-4 | 2.55×10-3 | 4.62×10-5 | 3.77×10-1 |
| B1 | 9.61×10-4 | 1.78×10-5 | 7.45×10-4 | - | - | - | - | - | 1.33×10-1 |
| B2 | 1.75×10-3 | 3.03×10-5 | 1.03×10-3 | 8.51×10-5 | - | - | 5.59×10-4 | - | 1.47×10-1 |
| B3 | 1.52×10-3 | 3.85×10-5 | 1.62×10-3 | 9.26×10-5 | 5.19×10-4 | 5.16×10-5 | 7.81×10-4 | 4.34×10-5 | 2.96×10-1 |
| B4 | - | 8.12×10-4 | 3.73×10-2 | 1.79×10-3 | 1.67×10-2 | 6.60×10-4 | 3.58×10-3 | 6.91×10-4 | 3.27×10-1 |
| C1 | 1.62×10-3 | 6.09×10-5 | 2.70×10-3 | 1.08×10-4 | 7.86×10-4 | 4.88×10-5 | - | 6.30×10-5 | 4.03×10-1 |
| C2 | 2.32×10-3 | 4.10×10-5 | 1.89×10-3 | 7.95×10-5 | 7.97×10-4 | - | - | 4.65×10-5 | 1.35×10-1 |
| C3 | 5.52×10-4 | 2.56×10-4 | 1.00×10-2 | 5.44×10-4 | 3.69×10-3 | 1.52×10-4 | 1.55×10-3 | 1.75×10-4 | 1.88×10-1 |
| C4 | 2.24×10-3 | 4.33×10-4 | 1.86×10-2 | 1.01×10-3 | 1.05×10-2 | 3.74×10-4 | 2.48×10-3 | 4.70×10-4 | 2.06×10-1 |
| D1 | 4.54×10-3 | 9.95×10-5 | 3.86×10-3 | 1.40×10-4 | 1.29×10-3 | 5.86×10-5 | 5.21×10-4 | 8.83×10-5 | 3.00×10-2 |
| D2 | 2.52×10-3 | 1.11×10-5 | 9.77×10-4 | - | - | 4.41×10-5 | - | 5.21×10-5 | 9.48×10-3 |
| D3 | 3.45×10-3 | 5.65×10-5 | 2.67×10-3 | 9.27×10-5 | 7.06×10-4 | 8.08×10-5 | 6.15×10-4 | 1.07×10-4 | 5.40×10-2 |
| D4 | 7.05×10-3 | 9.79×10-4 | 3.32×10-2 | 1.23×10-3 | 9.30×10-3 | 2.89×10-3 | 2.66×10-2 | 3.88×10-3 | 3.42×10-1 |

**Table S3.** **The RQNCs values of PAHs in the soil of the riverbank area.**

|  | | **Nap** | | **Acy** | | **Ace** | | **Flu** | | **Phe** | | **Ant** | | **Fla** | | **Pyr** | |
| --- | --- | --- | --- | --- | --- | --- | --- | --- | --- | --- | --- | --- | --- | --- | --- | --- | --- |
| A1 | | 1.16×101 | | 3.85×10-1 | | 7.21×10-1 | | 9.52×10-1 | | 6.79×10-1 | | 2.69×10-1 | | 6.77×10-2 | | 4.53 | |
| A2 | | 1.32×101 | | 5.31×10-1 | | 9.48×10-1 | | 1.09 | | 8.44×10-1 | | 1.37×10-1 | | 7.69×10-2 | | 4.75 | |
| A3 | | 2.80×101 | | 6.20×10-1 | | 9.57×10-1 | | 1.62 | | 9.31×10-1 | | 1.52×10-1 | | 5.58×10-2 | | 2.74 | |
| A4 | | 1.45×101 | | 1.43 | | 1.35 | | 1.63 | | 3.00 | | 1.12 | | 4.96×10-1 | | 9.62 | |
| B1 | | 1.08×101 | | 2.18×10-1 | | 4.26×10-1 | | 8.87×10-1 | | 5.66×10-1 | | 3.28×10-2 | | 1.91×10-2 | | 2.00×10-1 | |
| B2 | | 1.14×101 | | - | | 6.03×10-1 | | 1.26 | | 9.58×10-1 | | 9.91×10-2 | | 2.17×10-2 | | - | |
| B3 | | 2.50×101 | | 3.93×10-1 | | 6.69×10-1 | | 1.65 | | 1.31 | | 1.01×10-1 | | 3.13×10-2 | | - | |
| B4 | | 1.21×101 | | 7.77×10-1 | | 1.32 | | 2.53 | | 2.99 | | 9.01×10-1 | | 3.33×10-1 | | 5.66 | |
| C1 | | 3.24×101 | | 3.95×10-1 | | 9.58×10-1 | | 3.62 | | 1.85 | | 1.73×10-1 | | 4.19×10-2 | | 3.14×10-1 | |
| C2 | | 1.04×101 | | 2.51×10-1 | | 5.50×10-1 | | 9.10×10-1 | | 7.11×10-1 | | 1.12×10-1 | | 2.98×10-2 | | - | |
| C3 | | 1.08×101 | | 4.29×10-1 | | 1.00 | | 1.21 | | 1.40 | | 5.31×10-1 | | 8.79×10-2 | | 1.63 | |
| C4 | | 5.76 | | 7.91×10-1 | | 1.26 | | 1.13 | | 1.87 | | 1.04 | | 2.25×10-1 | | 4.87 | |
| D1 | | - | | 2.41×10-1 | | 3.55×10-1 | | 2.44×10-1 | | 2.90×10-1 | | 2.13×10-1 | | 3.67×10-2 | | 5.58×10-1 | |
| D2 | | 3.42×10-1 | | 1.60×10-1 | | - | | - | | - | | 7.73×10-2 | | 7.75×10-3 | | - | |
| D3 | | 3.16 | | - | | 1.76×10-1 | | 2.02×10-1 | | 3.08×10-1 | | 2.61×10-1 | | 3.27×10-2 | | 4.89×10-1 | |
| D4 | | 1.06×101 | | 4.76×10-1 | | 1.75 | | 3.49 | | 3.56 | | 8.68×10-1 | | 2.42×10-1 | | 4.69 | |
| **Table S3.** **The RQNCs values of PAHs in the soil of the riverbank area.** | | | | | | | | | | | | | | | | | | |
|  | **BaA** | | **Chry** | | **BbF** | | **BkF** | | **BaP** | | **InP** | | **DaA** | | **BgP** | | **∑16PAHs** | |
| A1 | 1.71×10-1 | | 6.97×10-3 | | 1.99×10-1 | | 8.55×10-3 | | - | | - | | - | | 2.64×10-3 | | 1.95×101 | |
| A2 | 2.62×10-1 | | 1.28×10-2 | | 3.33×10-1 | | 1.95×10-2 | | 1.90×10-1 | | 6.41×10-3 | | 7.23×10-2 | | 1.34×10-2 | | 2.25×101 | |
| A3 | 2.24×10-1 | | 9.76×10-3 | | 2.99×10-1 | | 1.57×10-2 | | 1.48×10-1 | | 6.70×10-3 | | 8.76×10-2 | | 8.28×10-3 | | 3.59×101 | |
| A4 | - | | 7.21×10-2 | | 2.79 | | 1.86×10-1 | | 1.16 | | 5.12×10-2 | | 2.55×10-1 | | 4.62×10-2 | | 3.77×101 | |
| B1 | 9.61×10-2 | | 1.78×10-3 | | 7.45×10-2 | | - | | - | | - | | - | | - | | 1.33×101 | |
| B2 | 1.75×10-1 | | 3.03×10-3 | | 1.03E-01 | | 8.51×10-3 | | - | | - | | 5.59×10-2 | | - | | 1.47×101 | |
| B3 | 1.52×10-1 | | 3.85×10-3 | | 1.62E-01 | | 9.26×10-3 | | 5.19×10-2 | | 5.16×10-3 | | 7.81×10-2 | | 4.34×10-3 | | 2.96×101 | |
| B4 | - | | 8.12×10-2 | | 3.73 | | 1.79×10-1 | | 1.67 | | 6.60×10-2 | | 3.58×10-1 | | 6.91×10-2 | | 3.27×101 | |
| C1 | 1.62×10-1 | | 6.09×10-3 | | 2.70×10-1 | | 1.08×10-2 | | 7.86×10-2 | | 4.88×10-3 | | - | | 6.30×10-3 | | 4.03×101 | |
| C2 | 2.32×10-1 | | 4.10×10-3 | | 1.89×10-1 | | 7.95×10-3 | | 7.97×10-2 | | - | | - | | 4.65×10-3 | | 1.35×101 | |
| C3 | 5.52×10-2 | | 2.56×10-2 | | 1.00 | | 5.44×10-2 | | 3.69×10-1 | | 1.52×10-2 | | 1.55×10-1 | | 1.75×10-2 | | 1.88×101 | |
| C4 | 2.24×10-1 | | 4.33×10-2 | | 1.86 | | 1.01×10-1 | | 1.05 | | 3.74×10-2 | | 2.48×10-1 | | 4.70×10-2 | | 2.06×101 | |
| D1 | 4.54×10-1 | | 9.95×10-3 | | 3.86×10-1 | | 1.40×10-2 | | 1.29×10-1 | | 5.86×10-3 | | 5.21×10-2 | | 8.83×10-3 | | 3.00 | |
| D2 | 2.52×10-1 | | 1.11×10-3 | | 9.77×10-2 | | - | | - | | 4.41×10-3 | | - | | 5.21×10-3 | | 9.48×10-1 | |
| D3 | 3.45×10-1 | | 5.65×10-3 | | 2.67×10-1 | | 9.27×10-3 | | 7.06×10-2 | | 8.08×10-3 | | 6.15×10-2 | | 1.07×10-2 | | 5.40 | |
| D4 | 7.05×10-1 | | 9.79×10-2 | | 3.32 | | 1.23×10-1 | | 9.30×10-1 | | 2.89×10-1 | | 2.66 | | 3.88×10-1 | | 3.42×101 | |

**Table S4. Evaluation results of the single-factor index of heavy metals.**

|  | **Hg** | **As** | **Cu** | **Zn** | **Pb** | **Cd** | **Cr** | **Ni** |
| --- | --- | --- | --- | --- | --- | --- | --- | --- |
| A1 | 1.00 | 1.15 | 0.75 | 0.62 | 0.56 | 0.85 | 0.71 | 0.87 |
| A2 | 0.62 | 1.06 | 0.69 | 0.63 | 0.54 | 0.98 | 0.59 | 0.80 |
| A3 | 0.70 | 1.11 | 0.74 | 0.67 | 0.58 | 0.98 | 0.54 | 0.84 |
| A4 | 0.79 | 1.13 | 0.73 | 0.66 | 0.67 | 1.01 | 0.61 | 0.89 |
| B1 | 0.27 | 0.83 | 0.58 | 0.56 | 0.41 | 0.69 | 0.54 | 0.71 |
| B2 | 0.26 | 0.86 | 0.57 | 0.56 | 0.44 | 0.69 | 0.55 | 0.70 |
| B3 | 0.54 | 0.97 | 0.69 | 0.63 | 0.52 | 0.98 | 0.60 | 0.79 |
| B4 | 0.54 | 0.75 | 0.63 | 0.65 | 0.56 | 1.21 | 0.60 | 0.69 |
| C1 | 0.35 | 0.90 | 0.70 | 0.67 | 0.49 | 0.69 | 0.52 | 0.81 |
| C2 | 0.24 | 0.88 | 0.63 | 0.59 | 0.50 | 0.56 | 0.62 | 0.75 |
| C3 | 0.34 | 1.00 | 0.83 | 0.65 | 0.55 | 0.85 | 0.58 | 0.78 |
| C4 | 0.29 | 0.92 | 0.68 | 0.65 | 0.52 | 0.69 | 0.56 | 0.80 |
| D1 | 0.24 | 0.83 | 0.61 | 0.57 | 0.42 | 0.69 | 0.51 | 0.74 |
| D2 | 0.39 | 0.84 | 0.57 | 0.55 | 0.43 | 0.69 | 0.67 | 0.71 |
| D3 | 0.28 | 0.91 | 0.65 | 0.62 | 0.44 | 0.69 | 0.51 | 0.77 |
| D4 | 0.31 | 0.84 | 0.62 | 0.58 | 0.49 | 0.69 | 0.55 | 0.71 |
